# Supplementary material
Source: publisher figshare collection journal article supplement (https://tandf.figshare.com/ndownloader/files/18714971)

**Supplementary 3:** A-Four most parsimonious trees obtained by IWA. B- Branch support values (Symmetric resampling).

A-


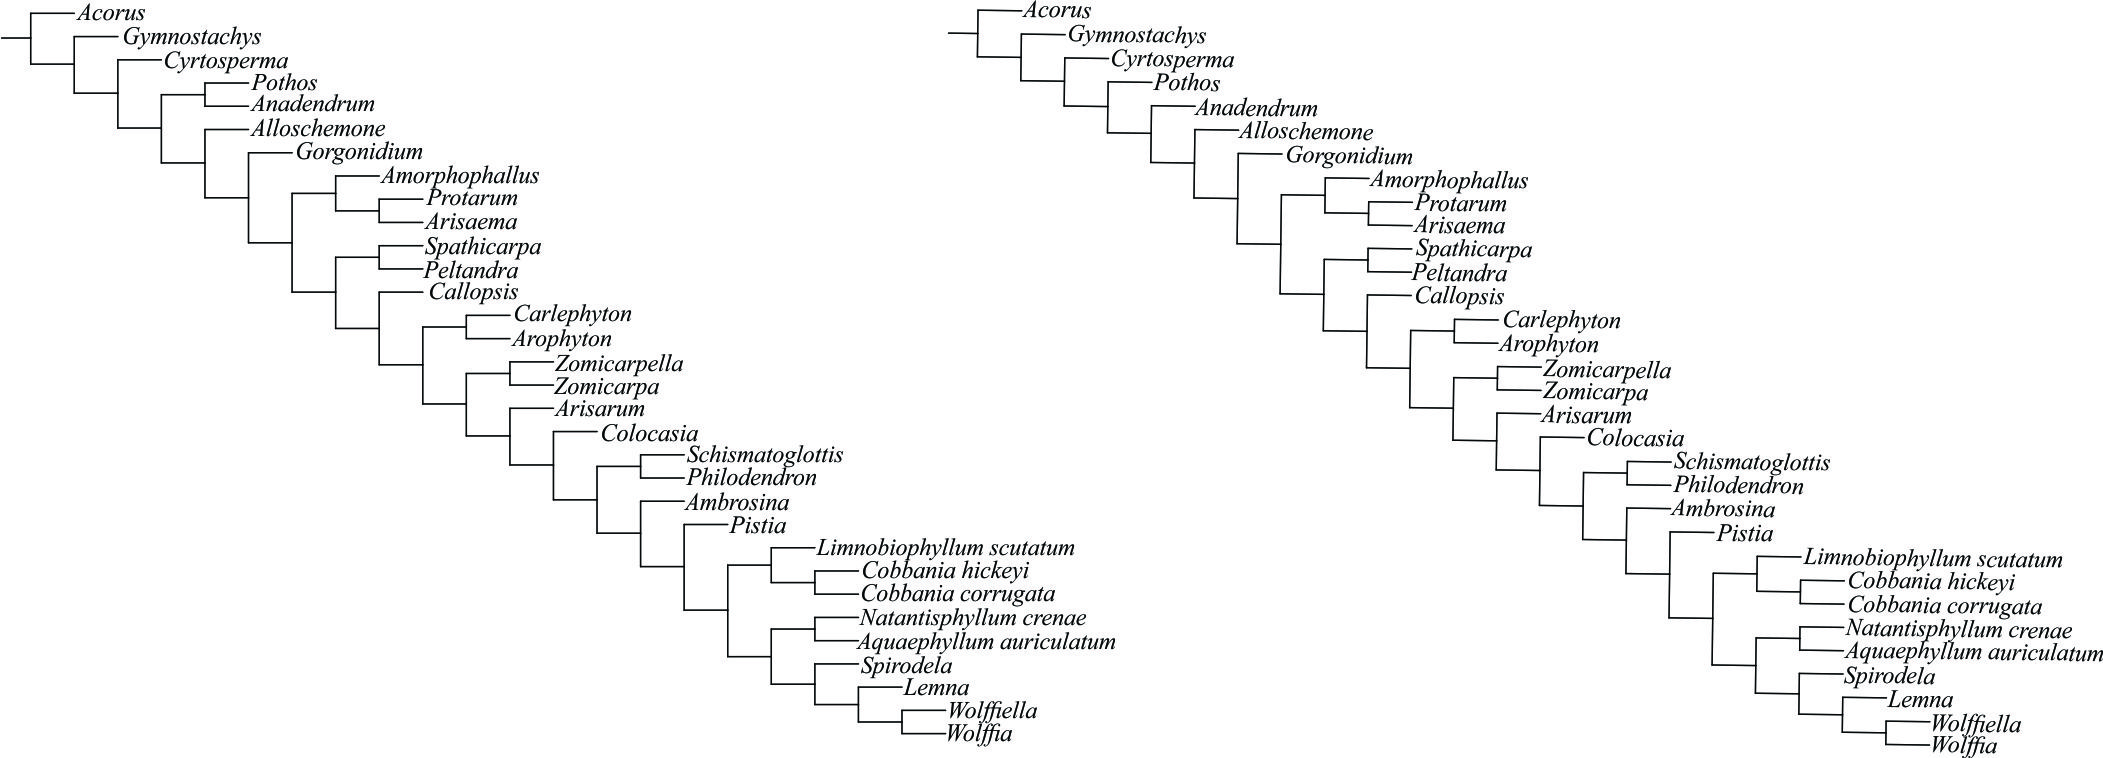


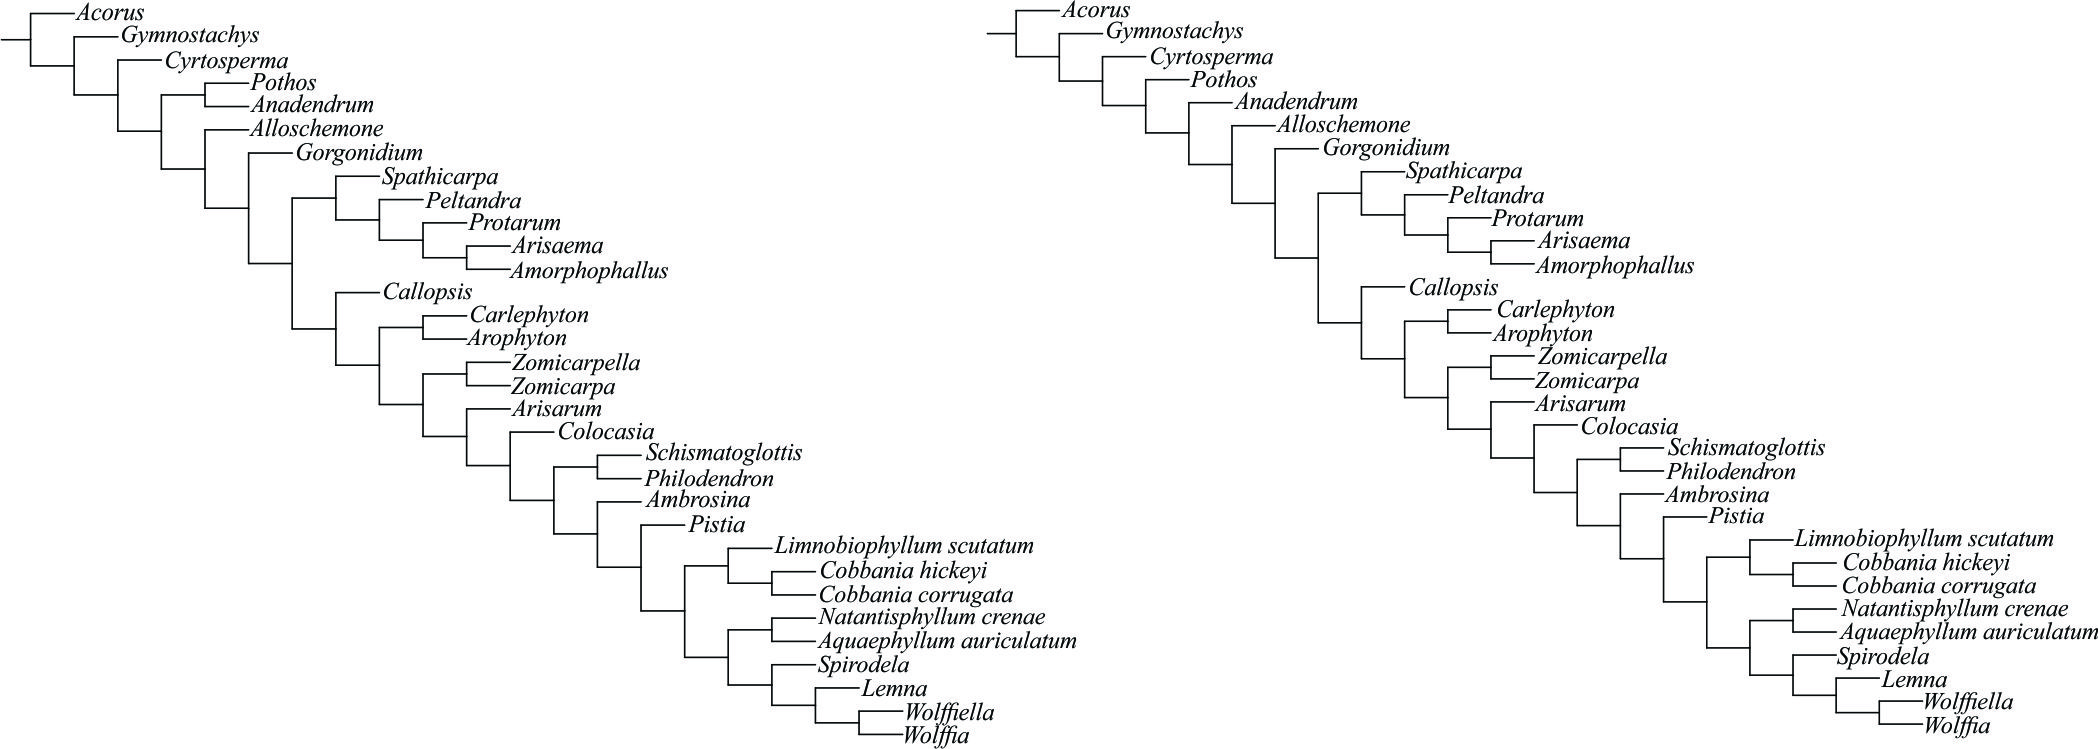


B-


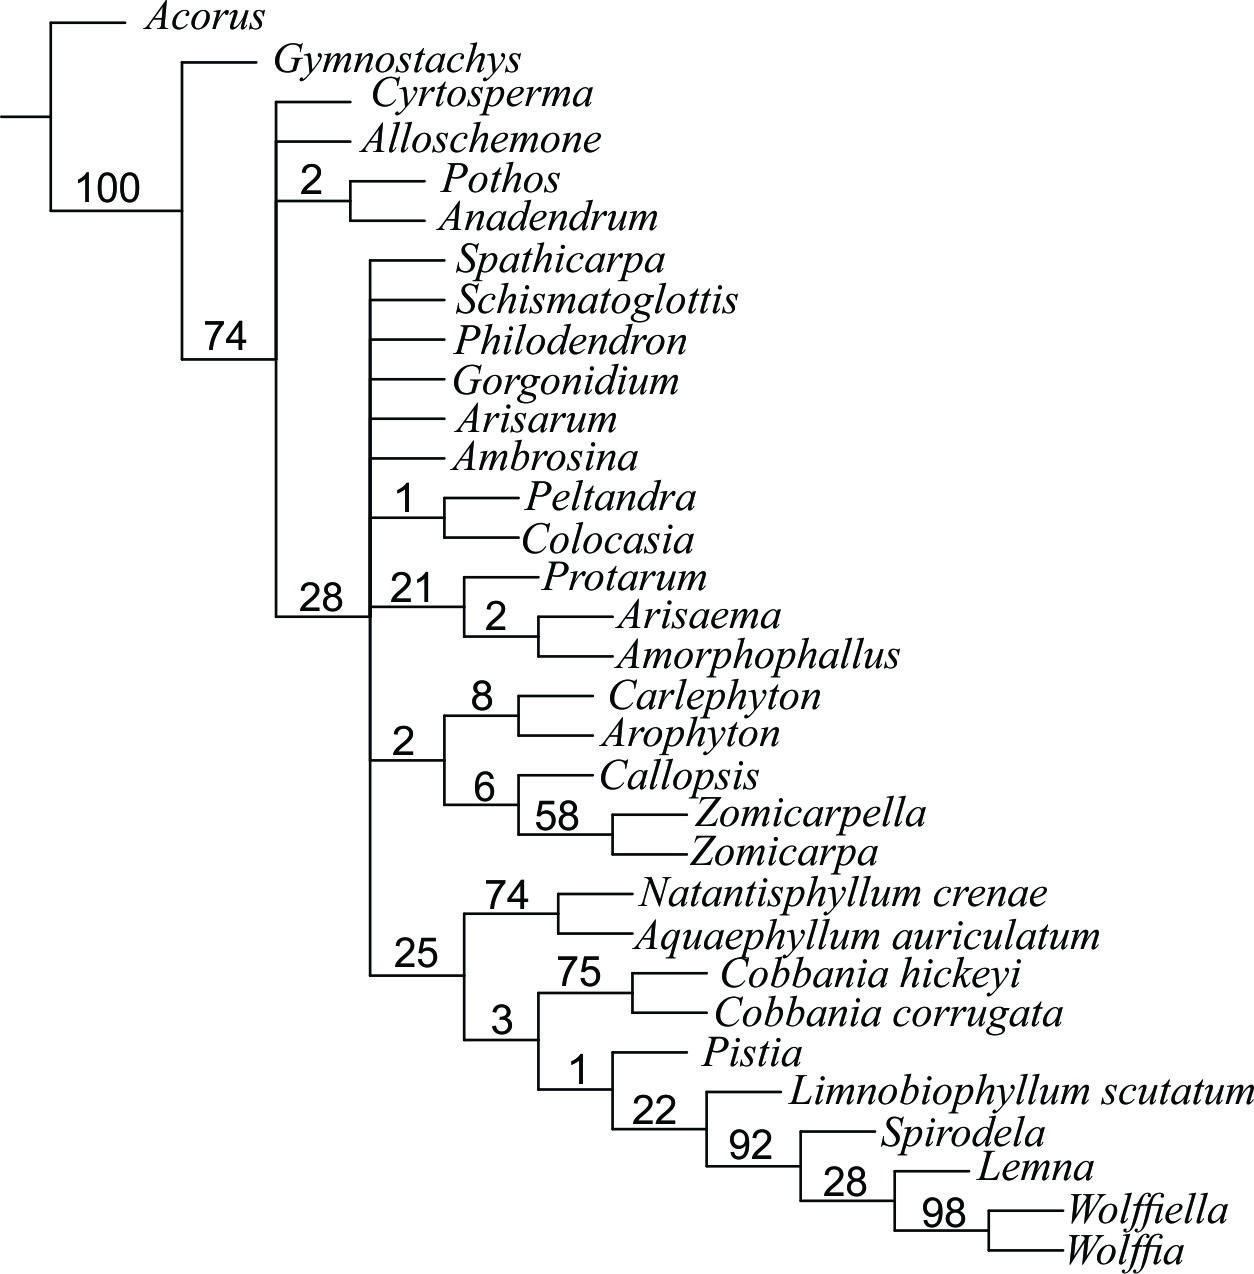

Supplement: Supplementary file 1 [file 18714971]
